# Supplementary material for: Linagliptin Ameliorates Hepatic Steatosis via Non-Canonical Mechanisms in Mice Treated with a Dual Inhibitor of Insulin Receptor and IGF-1 Receptor
Source: MDPI journal article supplement (doi:10.3390/ijms21217815), 2020-10-22
Supplement: s1 [file s1]

## Supplementary Materials

### Supplementary Figure 1

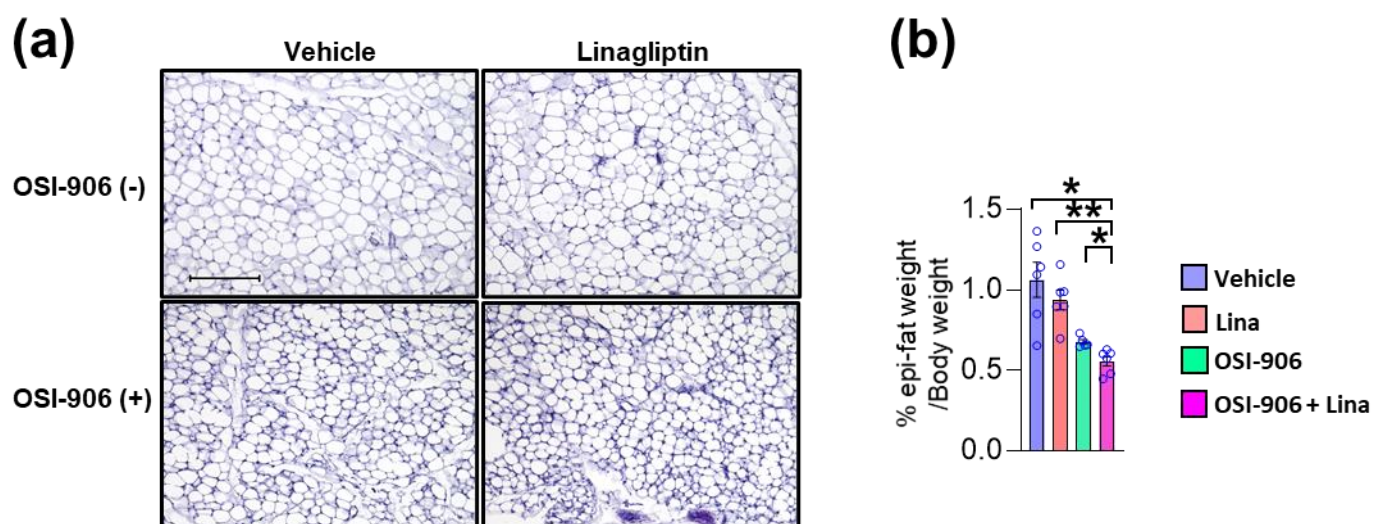

**Supplementary Figure 1.** Linagliptin did not improve lipoatrophy evoked by OSI-906. **(a)** Hematoxylin and eosin-stained sections of epididymal fat on day 7. Scale bar = 200  $\mu$ m. **(b)** Ratio of epididymal fat weight to body weight on day 7. Data represent the mean  $\pm$  SEM. \* $P$  < 0.05, \*\* $P$  < 0.01 ( $n$  = 5-6 per group) by ANOVA with an additional Tukey-Kramer post-hoc test.

Supplementary Figure 2

(a)

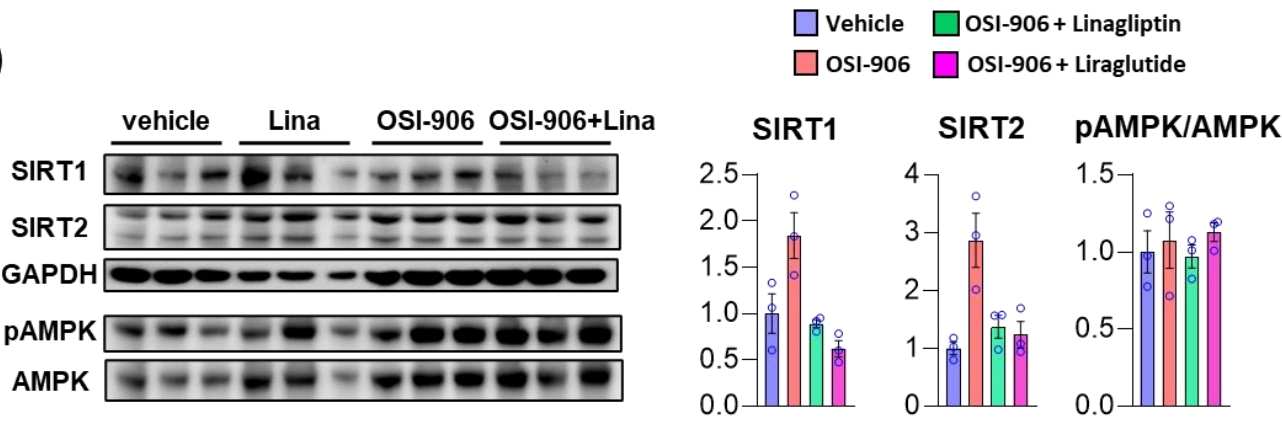

(b)

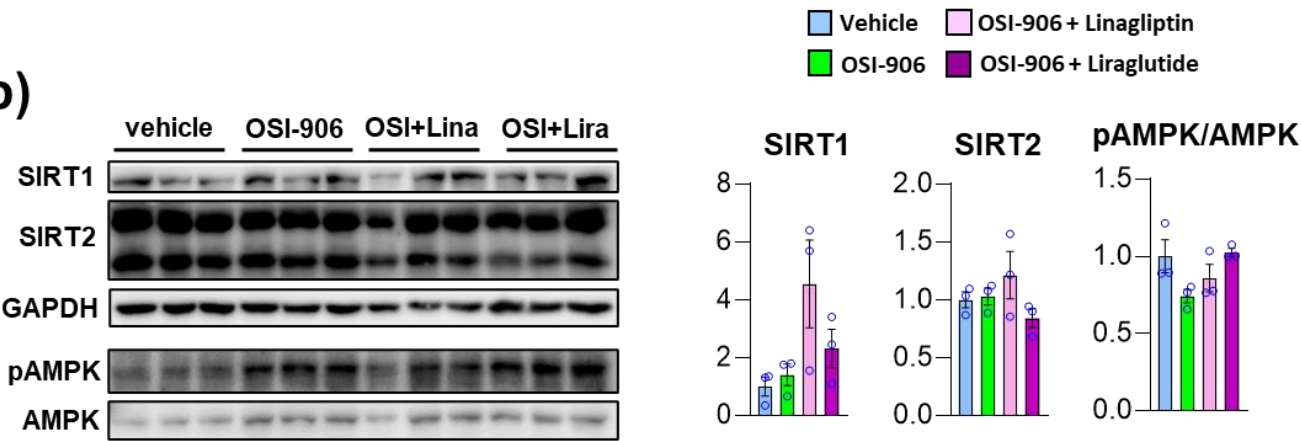

**Supplementary Figure 2.** Sirtuin expression and phosphorylation in AMPK in the liver and AML-12 cells.

(a) Immunoblotting for SIRT1, SIRT2, and phosphorylation in AMPK in the liver. Densitometry of each protein was described in right graphs ( $n = 3$  per group). (b) Immunoblotting for SIRT1, SIRT2, and phosphorylation in AMPK in AML-12 cells treated with 10 nM linagliptin or 100 nM liraglutide in the presence of 200 nM OSI-906 are shown. Cells were serum-starved overnight and then incubated with OSI-906 for 4 hours before the treatment with linagliptin or liraglutide. Then, the cells were incubated for 24 hours with the indicated drugs. Densitometry of each protein was described in right graphs ( $n = 3$  per group). Data represent the mean  $\pm$  SEM.

## Supplementary Figure 3

(a)

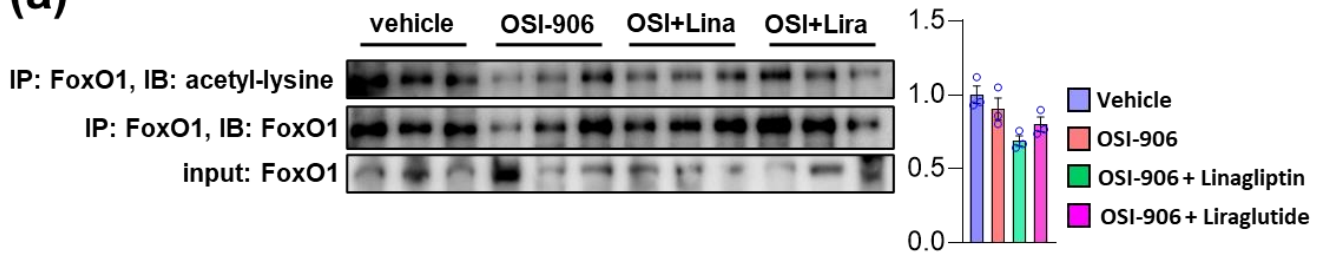

(b)

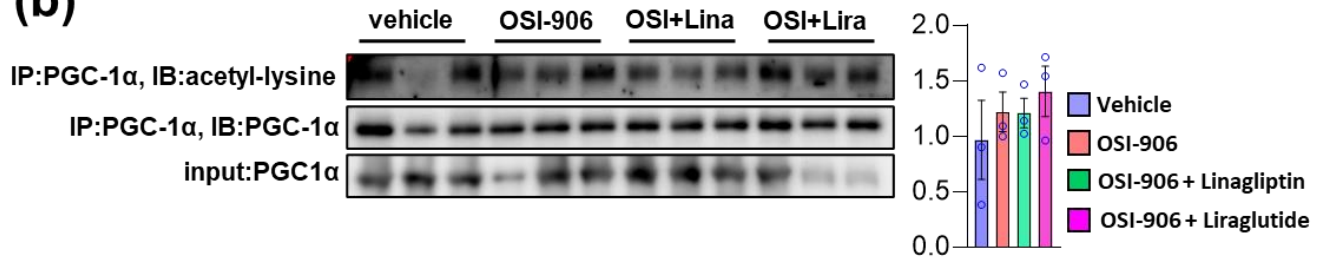

**Supplementary Figure 3.** Sirtuin deacetylase activity on FoxO1 and PGC-1α in the liver.

(a) Immunoblotting for acetylated lysine after immunoprecipitation with FoxO1 in the liver. Densitometry of each protein was described in right graphs ( $n = 3$  per group). (b) Immunoblotting for acetylated lysine after immunoprecipitation with PGC-1α in the liver. Densitometry of each protein was described in right graphs ( $n = 3$  per group). Data represent the mean  $\pm$  SEM.

**Supplementary Table 1.** Proteins with hepatic expressions that were significantly altered by OSI-906 administration and restored by treatment with linagliptin

Protein expressions that were upregulated in OSI-906-treated liver and downregulated by linagliptin treatment

| Protein Description                                                             | OSI-906 vs. vehicle |                       | OSI-906 vs. OSI-906 +<br>Lina |                       |
|---------------------------------------------------------------------------------|---------------------|-----------------------|-------------------------------|-----------------------|
|                                                                                 | FC                  | ANOVA<br>( <i>P</i> ) | FC                            | ANOVA<br>( <i>P</i> ) |
| Cytochrome P450 2B10                                                            | 4.51                | 0.0091                | 3.44                          | 0.0272                |
| Perilipin-2                                                                     | 3.60                | 0.0007                | 2.19                          | 0.0073                |
| Aspartate aminotransferase, cytoplasmic                                         | 2.58                | 0.0000                | 1.38                          | 0.0265                |
| Phosphoacetylglucosamine mutase                                                 | 1.35                | 0.0296                | 1.31                          | 0.0387                |
| Bifunctional ATP-dependent dihydroxyacetone kinase/FAD-AMP<br>Lyase (cyclizing) | 1.92                | <0.0001               | 1.28                          | 0.0101                |
| Fibronectin                                                                     | 1.21                | 0.0489                | 1.22                          | 0.0389                |

Proteins expressions that were downregulated in OSI-906-treated liver and upregulated by linagliptin treatment

| Protein Description                                              | OSI-906 vs. vehicle |                       | OSI-906 vs. OSI-906 +<br>Lina |                       |
|------------------------------------------------------------------|---------------------|-----------------------|-------------------------------|-----------------------|
|                                                                  | FC                  | ANOVA<br>( <i>P</i> ) | FC                            | ANOVA<br>( <i>P</i> ) |
| Major urinary protein 20                                         | 3.52                | 0.0038                | 2.23                          | 0.0440                |
| Lanosterol 14- $\alpha$ demethylase                              | 2.30                | 0.0065                | 1.89                          | 0.0147                |
| Isopentenyl-diphosphate Delta-isomerase 1                        | 1.67                | 0.0375                | 1.74                          | 0.0041                |
| ORM1-like protein 2                                              | 2.34                | 0.0013                | 1.57                          | 0.0106                |
| Protein YIPF5                                                    | 1.69                | 0.0034                | 1.51                          | 0.0370                |
| Sterol-4- $\alpha$ -carboxylate 3-dehydrogenase, decarboxylating | 1.38                | 0.0396                | 1.50                          | 0.0026                |
| Aldose reductase                                                 | 1.32                | 0.0467                | 1.50                          | 0.0125                |
| Fetuin-B                                                         | 1.67                | 0.0014                | 1.46                          | 0.0292                |
| Murinoglobulin-2                                                 | 2.18                | 0.0002                | 1.42                          | 0.0146                |
| 60S ribosomal protein L6                                         | 1.56                | 0.0009                | 1.38                          | 0.0196                |
| 7-Dehydrocholesterol reductase                                   | 1.44                | 0.0437                | 1.37                          | 0.0422                |
| Pyrethroid hydrolase Ces2a                                       | 1.50                | 0.0026                | 1.33                          | 0.0137                |
| RNA-binding protein with multiple splicing 2                     | 1.74                | 0.0018                | 1.32                          | 0.0416                |
| Thymosin beta-4                                                  | 1.47                | 0.0001                | 1.27                          | 0.0261                |
| Vimentin                                                         | 1.36                | 0.0368                | 1.27                          | 0.0370                |
| Carboxylesterase 1D                                              | 1.58                | 0.0011                | 1.23                          | 0.0284                |
| UDP-glucuronosyltransferase 2B17                                 | 1.32                | 0.0141                | 1.22                          | 0.0194                |
| 60S ribosomal protein L19                                        | 1.50                | <0.0001               | 1.22                          | 0.0395                |
| Cysteine desulfurase, mitochondrial                              | 1.25                | 0.0042                | 1.21                          | 0.0293                |

FC, fold change

**Supplementary Table 2.** Top upregulated or downregulated proteins in OSI-906-treated liver compared with vehicle-treated liver as revealed by a proteomic analysis

Upregulated in OSI-906-treated liver, compared with vehicle-treated liver

| Protein Description                                               | FC       | ANOVA ( <i>P</i> ) |
|-------------------------------------------------------------------|----------|--------------------|
| Steroid 17- $\alpha$ -hydroxylase/17,20 lyase                     | 36.6895  | 0.005451           |
| Cytochrome P450 2B10                                              | 4.512313 | 0.00908            |
| Nicotinamide N-methyltransferase                                  | 4.330706 | 1.25E-05           |
| Apolipoprotein A-V                                                | 3.775928 | 0.00259            |
| Guanine nucleotide-binding protein G(I)/G(S)/G(O) subunit gamma-1 | 3.627437 | 0.006191           |
| Perilipin-2                                                       | 3.603212 | 0.000742           |
| BRISC complex subunit Abro1                                       | 2.799342 | 0.004814           |
| Acyl-CoA synthetase short-chain family member 3, mitochondrial    | 2.787295 | 0.00223            |
| Aspartate aminotransferase, cytoplasmic                           | 2.576786 | 1.33E-05           |
| Apolipoprotein A-IV                                               | 2.535404 | 0.004353           |

Downregulated in OSI-906-treated liver, compared with vehicle-treated liver

| Protein Description                             | FC       | ANOVA ( <i>P</i> ) |
|-------------------------------------------------|----------|--------------------|
| Seminal vesicle secretory protein 4             | 22.56498 | 0.030458           |
| Major urinary protein 17                        | 4.820739 | 0.047282           |
| Major urinary protein 20                        | 3.52338  | 0.003799           |
| Complement component C8 alpha chain             | 3.003397 | 0.002165           |
| Developmentally-regulated GTP-binding protein 1 | 2.89517  | 0.047867           |
| Alpha-1-antitrypsin 1-5                         | 2.817766 | 0.000491           |
| Cytochrome P450 4A12A                           | 2.681725 | 0.032885           |
| Bile salt sulfotransferase 2                    | 2.597675 | 0.001371           |
| 3 beta-hydroxysteroid dehydrogenase type 5      | 2.5856   | 0.00529            |

FC, fold change

**Supplementary Table 3.** Top upregulated or downregulated proteins in OSI-906 + Lina-treated liver compared with OSI-906-treated liver as revealed by a proteomic analysis

Upregulated in OSI-906 + Lina-treated liver, compared with OSI-906-treated liver

| Protein Description                                              | FC       | ANOVA ( <i>P</i> ) |
|------------------------------------------------------------------|----------|--------------------|
| Major urinary protein 20                                         | 2.232176 | 0.044048           |
| Lanosterol 14- $\alpha$ demethylase                              | 1.892745 | 0.01474            |
| Isopentenyl-diphosphate Delta-isomerase 1                        | 1.743062 | 0.004141           |
| ORM1-like protein 2                                              | 1.569106 | 0.010644           |
| Protein YIPF5                                                    | 1.509277 | 0.037018           |
| Sterol-4- $\alpha$ -carboxylate 3-dehydrogenase, decarboxylating | 1.50342  | 0.002579           |
| Aldose reductase                                                 | 1.501844 | 0.012548           |
| Vacuolar protein-sorting-associated protein 25                   | 1.499779 | 0.018167           |
| Ubiquinone biosynthesis protein COQ7 homolog                     | 1.49701  | 0.005744           |
| 60S ribosomal protein L37                                        | 1.478085 | 0.048925           |
| Fetuin-B                                                         | 1.464528 | 0.029177           |
| Transgelin-2                                                     | 1.453406 | 0.026038           |
| Murinoglobulin-2                                                 | 1.42467  | 0.014641           |
| 60S ribosomal protein L6                                         | 1.3833   | 0.019583           |

Downregulated in OSI-906 + Lina-treated liver, compared with OSI-906-treated liver

| Protein Description                     | FC       | ANOVA ( <i>P</i> ) |
|-----------------------------------------|----------|--------------------|
| Cytochrome P450 2B10                    | 3.442558 | 0.027156           |
| Perilipin-2                             | 2.189518 | 0.007271           |
| E3 ubiquitin-protein ligase UBR4        | 1.592003 | 0.03672            |
| Sulfotransferase 1 family member D1     | 1.485781 | 0.041096           |
| Histone H1.5                            | 1.423912 | 0.029306           |
| Aspartate aminotransferase, cytoplasmic | 1.382278 | 0.026541           |

FC, fold change

**Supplementary Table 4.** Top upregulated or downregulated phosphopeptides in OSI-906-treated liver compared with vehicle-treated liver as revealed by a phosphoproteomic analysis

Upregulated phosphopeptide in OSI-906-treated liver compared with vehicle-treated liver

| Uniprot ID | Phospho site | Protein Description                                       | FC       |
|------------|--------------|-----------------------------------------------------------|----------|
| Q3UHX2     | S60          | 28 kDa heat- and acid-stable phosphoprotein               | Infinity |
| Q8K2K6     | S293         | Arf-GAP domain and FG repeat-containing protein 1         | Infinity |
| Q8K019     | S396         | Bcl-2-associated transcription factor 1                   | Infinity |
| O35218     | S419, S420   | Cleavage and polyadenylation specificity factor subunit 2 | Infinity |
| Q5NCI0     | S437         | Up-regulator of cell proliferation                        | 365.43   |
| P57016     | S62          | Ladinin-1                                                 | 197.61   |
| Q3UPL0     | S526, S530   | Protein transport protein Sec31A                          | 121.93   |
| Q9CZ44     | S74          | NSFL1 cofactor p47                                        | 66.80    |
| Q02819     | S85          | Nucleobindin-1                                            | 64.62    |
| Q9Z131     | S424         | SH3 domain-binding protein 5                              | 62.64    |
| Q64511     | S1387        | DNA topoisomerase 2-beta                                  | 54.83    |
| Q63918     | S363         | Serum deprivation-response protein                        | 47.72    |
| Q9CW07     | S81          | Protein phosphatase 1 regulatory subunit 3G               | 38.60    |
| Q8K3J9     | Y386         | G-protein coupled receptor family C group 5 member C      | 31.32    |
| Q4FJU9     | S129         | Transmembrane protein 40                                  | 30.37    |
| E9Q557     | S2620        | Desmoplakin                                               | 25.28    |
| P53996     | S49          | Cellular nucleic acid-binding protein                     | 20.91    |
| P60904     | S10          | DnaJ homolog subfamily C member 5                         | 19.47    |
| P16546     | S1031        | Spectrin alpha chain, non-erythrocytic 1                  | 16.66    |
| Q9Z1X4     | S482         | Interleukin enhancer-binding factor 3                     | 15.77    |

FC, fold change

**Supplementary Table 5.** Top upregulated or downregulated phosphopeptides in OSI-906-treated liver compared with vehicle-treated liver as revealed by a phosphoproteomic analysis

Downregulated phosphopeptide in OSI-906-treated liver compared with vehicle-treated liver

| Uniprot ID | Phosphosite | Protein Description                                                      | FC       |
|------------|-------------|--------------------------------------------------------------------------|----------|
| Q6PAM0     | S183        | 5'-AMP-activated protein kinase subunit beta-2                           | Infinity |
| Q8BP67     | S86         | 60S ribosomal protein L24                                                | Infinity |
| P28474     | S247        | Alcohol dehydrogenase class-3                                            | Infinity |
| Q6PEE2     | S72         | CBP80/20-dependent translation initiation factor                         | Infinity |
| O88735     | T243        | Ensconsin                                                                | Infinity |
| Q6P9Q6     | S1159       | FK506-binding protein 15                                                 | Infinity |
| Q6ZQ58     | S824        | La-related protein 1                                                     | Infinity |
| O08638     | S1954       | Myosin-11                                                                | Infinity |
| Q8CES0     | S39         | N-alpha-acetyltransferase 30                                             | Infinity |
| Q8K3K8     | T210        | Optineurin                                                               | Infinity |
| A2AJ88     | S377        | Patatin-like phospholipase domain-containing protein 7                   | Infinity |
| Q3U1F9     | S351        | Phosphoprotein associated with glycosphingolipid-enriched microdomains 1 | Infinity |
| P60335     | S190        | Poly(rC)-binding protein 1                                               | Infinity |
| Q8K1L5     | S82         | Protein phosphatase 1 regulatory subunit 11                              | Infinity |
| Q3TSG4     | S385        | RNA demethylase ALKBH5                                                   | Infinity |
| O89032     | S812        | SH3 and PX domain-containing protein 2A                                  | Infinity |
| Q1HFZ0     | S723        | tRNA (cytosine(34)-C(5))-methyltransferase                               | Infinity |
| Q6P4T2     | S225        | U5 small nuclear ribonucleoprotein 200 kDa helicase                      | Infinity |
| Q9CQU5     | S216        | ZW10 interactor                                                          | Infinity |
| P56212     | S62         | cAMP-regulated phosphoprotein 19                                         | 784.37   |

FC, fold change



**Supplementary Table 6.** Top upregulated or downregulated phosphopeptides in OSI-906 + Lina-treated liver compared with OSI-906-treated liver as revealed by a phosphoproteomic analysis.

Upregulated phosphopeptide in OSI-906 + Lina-treated liver compared with OSI-906-treated liver

| Uniprot ID | Phosphosite | Protein Description                                   | FC       |
|------------|-------------|-------------------------------------------------------|----------|
| Q99J36     | S8          | THUMP domain-containing protein 1                     | Infinity |
| Q8K3K8     | T210        | Optineurin                                            | Infinity |
| Q8VCB3     | S8          | Glycogen [starch] synthase, liver                     | Infinity |
| P14869     | S304        | 60S acidic ribosomal protein P0                       | 1302.87  |
| P11352     | S201        | Glutathione peroxidase 1                              | 255.83   |
| Q8K2C9     | S114        | Very-long-chain (3R)-3-hydroxyacyl-CoA dehydratase 3  | 147.00   |
| O88622     | S311        | Poly(ADP-ribose) glycohydrolase                       | 104.31   |
| C0HKD8     | T267        | Microfibrillar-associated protein 1                   | 42.10    |
| P24788     | S270        | Cyclin-dependent kinase 11B                           | 37.66    |
| Q1HFZ0     | S723        | tRNA (cytosine(34)-C(5))-methyltransferase            | 24.68    |
| Q3UIR3     | S4          | E3 ubiquitin-protein ligase DTX3L                     | 22.55    |
| Q3UPL0     | S526        | Protein transport protein Sec31A                      | 15.80    |
| Q8R0W0     | S3222       | Epiplakin                                             | 12.02    |
| Q5XG73     | S184        | Acyl-CoA-binding domain-containing protein 5          | 11.86    |
| P07901     | S194        | Heat shock protein HSP 90- $\alpha$                   | 10.32    |
| Q91YI0     | S5          | Argininosuccinate lyase                               | 9.05     |
| Q61586     | S687        | Glycerol-3-phosphate acyltransferase 1, mitochondrial | 7.97     |
| Q9D0F9     | S117        | Phosphoglucomutase-1                                  | 7.46     |
| Q8K2C9     | S114        | Very-long-chain (3R)-3-hydroxyacyl-CoA dehydratase 3  | 7.31     |
| Q3THG9     | S409        | Alanyl-tRNA editing protein Aarsd1                    | 6.72     |

FC, fold change

**Supplementary Table 7.** Top upregulated or downregulated phosphopeptides in OSI-906 + Lina-treated liver compared with OSI-906-treated liver as revealed by a phosphoproteomic analysis.

Downregulated phosphopeptide in OSI-906 + Lina-treated liver compared with OSI-906-treated liver

| Uniprot ID | Phosphosite | Protein Description                                     | FC       |
|------------|-------------|---------------------------------------------------------|----------|
| Q7TN98     | S99         | Cytoplasmic polyadenylation element-binding protein 4   | Infinity |
| Q91YR1     | S143        | Twinfilin-1                                             | Infinity |
| Q3TLH4     | S189, S191  | Protein PRRC2C                                          | Infinity |
| Q8BWW4     | S578        | La-related protein 4                                    | Infinity |
| P59242     | S134        | Cingulin                                                | Infinity |
| P29699     | S138        | Alpha-2-HS-glycoprotein                                 | Infinity |
| D3Z6Q9     | S443        | Bridging integrator 2                                   | Infinity |
| P51954     | S1071       | Serine/threonine-protein kinase Nek1                    | Infinity |
| P11679     | S336        | Keratin, type II cytoskeletal 8                         | 1286.64  |
| Q8CI51     | S228        | PDZ and LIM domain protein 5                            | 68.39    |
| Q8K2C9     | S114        | Very-long-chain (3R)-3-hydroxyacyl-CoA dehydratase 3    | 64.81    |
| Q9JLV1     | S360        | BAG family molecular chaperone regulator 3              | 22.55    |
| P51859     | T200        | Hepatoma-derived growth factor                          | 13.39    |
| P47955     | S101, S104  | 60S acidic ribosomal protein P1                         | 11.59    |
| Q99K28     | S339        | ADP-ribosylation factor GTPase-activating protein 2     | 7.58     |
| P70302     | S519        | Stromal interaction molecule 1                          | 7.40     |
| P27546     | S901        | Microtubule-associated protein 4                        | 5.84     |
| Q8BI08     | S2          | Protein MAL2                                            | 4.72     |
| Q9JIX8     | S825        | Apoptotic chromatin condensation inducer in the nucleus | 2.56     |
| Q6ZQ58     | T626        | La-related protein 1                                    | 2.28     |

FC, fold change

**Supplementary Table 8.** Top upstream regulators as revealed by a proteomic analysis

OSI-906 vs. Vehicle

| Top Upstream Regulators | $-\text{LOG}_{10}(P\text{-value})$ | Predicted<br>Activation |
|-------------------------|------------------------------------|-------------------------|
| PPARA                   | 9.436518915                        | Inhibited               |
| bezafibrate             | 6.28567024                         | Inhibited               |
| XBP1                    | 6.262012674                        | Activated               |
| pirinixic acid          | 5.747146969                        | Inhibited               |
| ciprofibrate            | 5.329754147                        | Inhibited               |

OSI-906 + Lina vs. OSI-906

| Top Upstream Regulators | $-\text{LOG}_{10}(P\text{-value})$ | Predicted<br>Activation |
|-------------------------|------------------------------------|-------------------------|
| SREBF2                  | 9.436518915                        | Inhibited               |
| SH3TC2                  | 6.28567024                         |                         |
| lysophosphatidylcholine | 6.262012674                        | Inhibited               |
| AGN194204               | 5.747146969                        |                         |
| NFE2L2                  | 5.329754147                        |                         |

**Supplementary Table 9.** Primer sequence for real-time PCR

| Gene Name   | Forward                         | Reverse                           |
|-------------|---------------------------------|-----------------------------------|
| Ccl2        | 5'-TTAAAAACCTGGATCGGAACCAA-3'   | 5'-GCATTAGCTTCAGATTACGGGT-3'      |
| Cd36        | 5'-CCTTAAAGGAATCCCCGTGT-3'      | 5'-TGCATTTGCCAATGTCTAGC-3'        |
| Cyp2b10     | 5'-CAATGTTTAGTGGAGGAACTGCG-3'   | 5'-CACTGGAAGAGGAACGTGGG-3'        |
| Fas         | 5'-CCTGGATAGCATTCGGAACCT-3'     | 5'-AGCACATCTCGAAGGCTACACA-3'      |
| Gck         | 5'-GCGGAGATGCTCTTTGAC-3'        | 5'-GTCCCACGATGTTGTTCC-3'          |
| G6pase      | 5'-TCTGTCCCGGATCTACCTTG-3'      | 5'-GAAAGTTTCAGCCACAGCAA-3'        |
| ICAM-1      | 5'-AGATCACATTCACGGTGCTG-3'      | 5'-CTTCAGAGGAGGAAACAGG-3'         |
| Il-6        | 5'-TAGTCCTTCCTACCCCAATTTCC-3'   | 5'-TTGGTCCTTAGCCACTCCTTC-3'       |
| iNOS        | 5'-CCCTTCCGAAGTTTCTGGCAGCAGC-3' | 5'-GGCTGTCAGAGAGCCTCGTGGCTTTGG-3' |
| NNMT        | 5'-AGGAACCAGGAGCCTTTGACT-3'     | 5'-CCTGAGGGCAGTGCGATAGG-3'        |
| PAI-1       | 5'-GACACCCTCAGCATGTTTCATC-3'    | 5'-AGGGTTGCACTAAACATGTCAG-3'      |
| Pepck       | 5'-CTGCATAACGGTCTGGACTTC-3'     | 5'-CAGCAACTGCCCCGTACTCC-3'        |
| Perilipin 2 | 5'-GTGGAAAGGACCAAGTCTGTG-3'     | 5'-GACTCCAGCCGTTCATAGTTG-3'       |
| Pgc1a       | 5'-AACCACACCCACAGGATCAGA-3'     | 5'-TCTTCGCTTTATTGCTCCATGA-3'      |
| Ppara       | 5'-ACGATGCTGTCCTCCTTGATG-3'     | 5'-GTGTGATAAAGCCATTGCCGT-3'       |
| Scd1        | 5'-CCGGAGACCCCTTAGATCGA-3'      | 5'-TAGCCTGTAAAAGATTTCTGCAAACC-3'  |
| Socs3       | 5'-GGGTGGCAAAGAAAAGGAG-3'       | 5'-GTTGAGCGTCAAGACCCAGT-3'        |
| Srebp1c     | 5'-GGCACTAAGTGCCCTCAACCT-3'     | 5'-GCCACATAGATCTCTGCCAGTGT-3'     |
| Tbp         | 5'-GGGGAGCTGTGATGTGAAGT-3'      | 5'-CCAGGAAATAATTCTGGCTCA-3'       |
| Tnf         | 5'-CCCTCACACTCAGATCATCTTCT-3'   | 5'-GCTACGACGTGGGCTACAG-3'         |
