# Supplementary material for: Linagliptin Ameliorates Hepatic Steatosis via Non-Canonical Mechanisms in Mice Treated with a Dual Inhibitor of Insulin Receptor and IGF-1 Receptor
Source: MDPI journal article supplement (doi:10.3390/ijms21217815), 2020-10-22

# Uncropped images of immunoblots in figures.

The black boxes indicate the cropped band of each immunoblot presented in the corresponding figures.

Fig. 5a

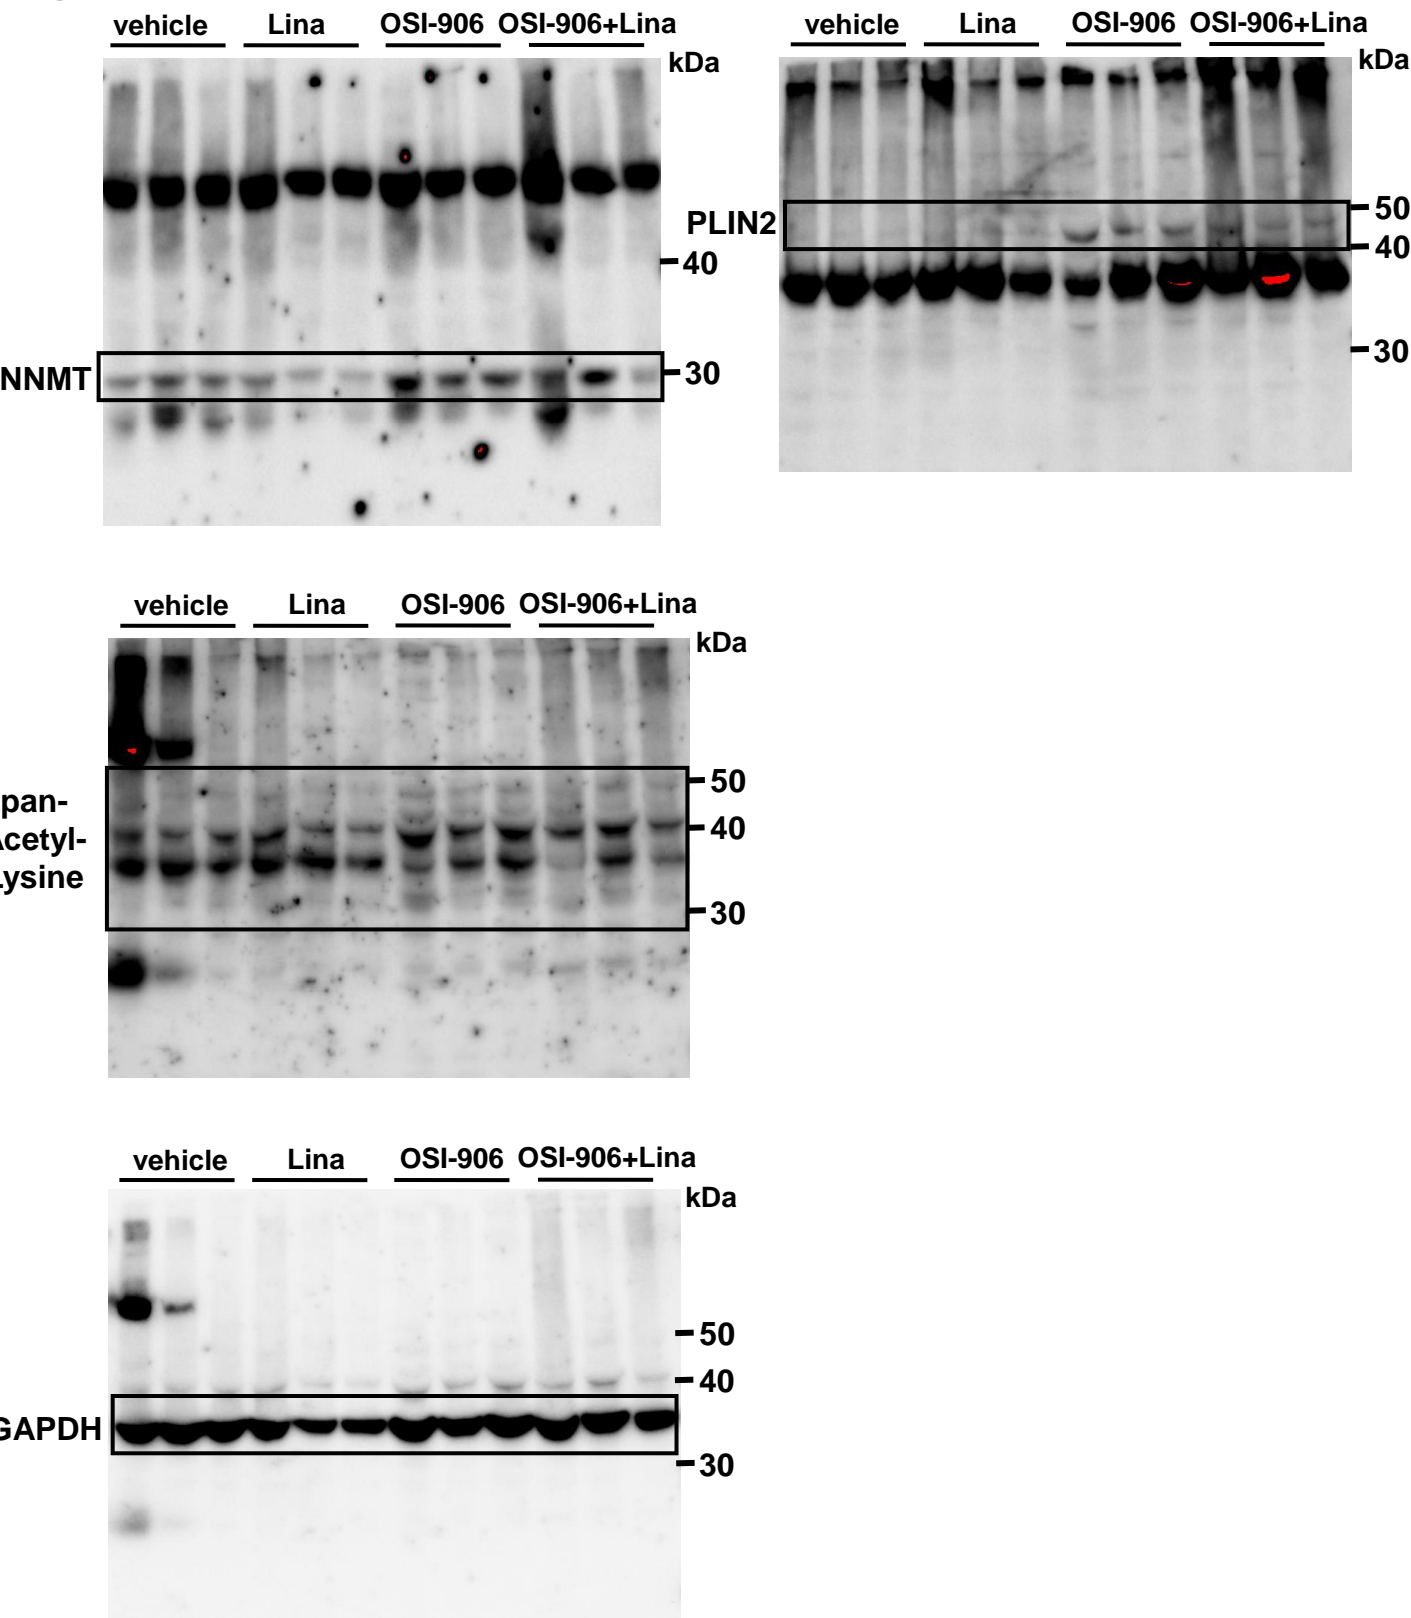

Supplementary Fig. 2a

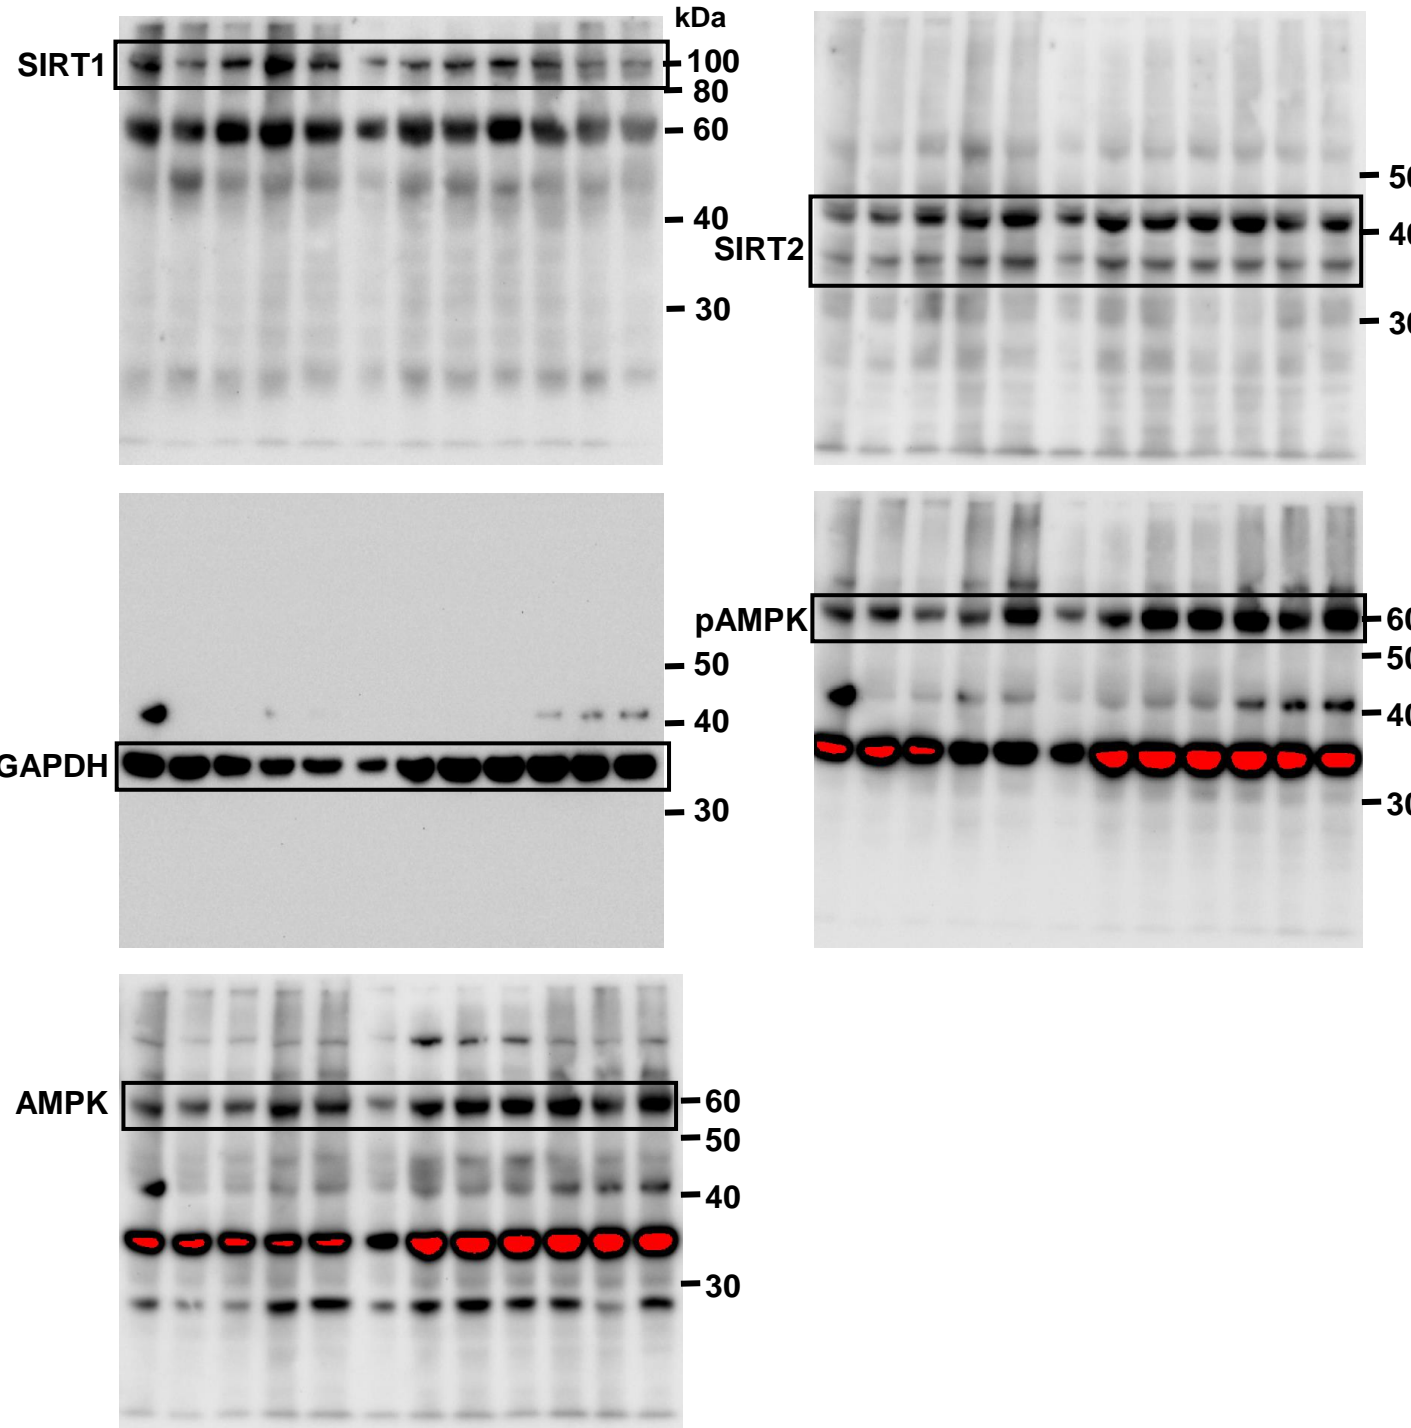

Supplementary Fig. 2b

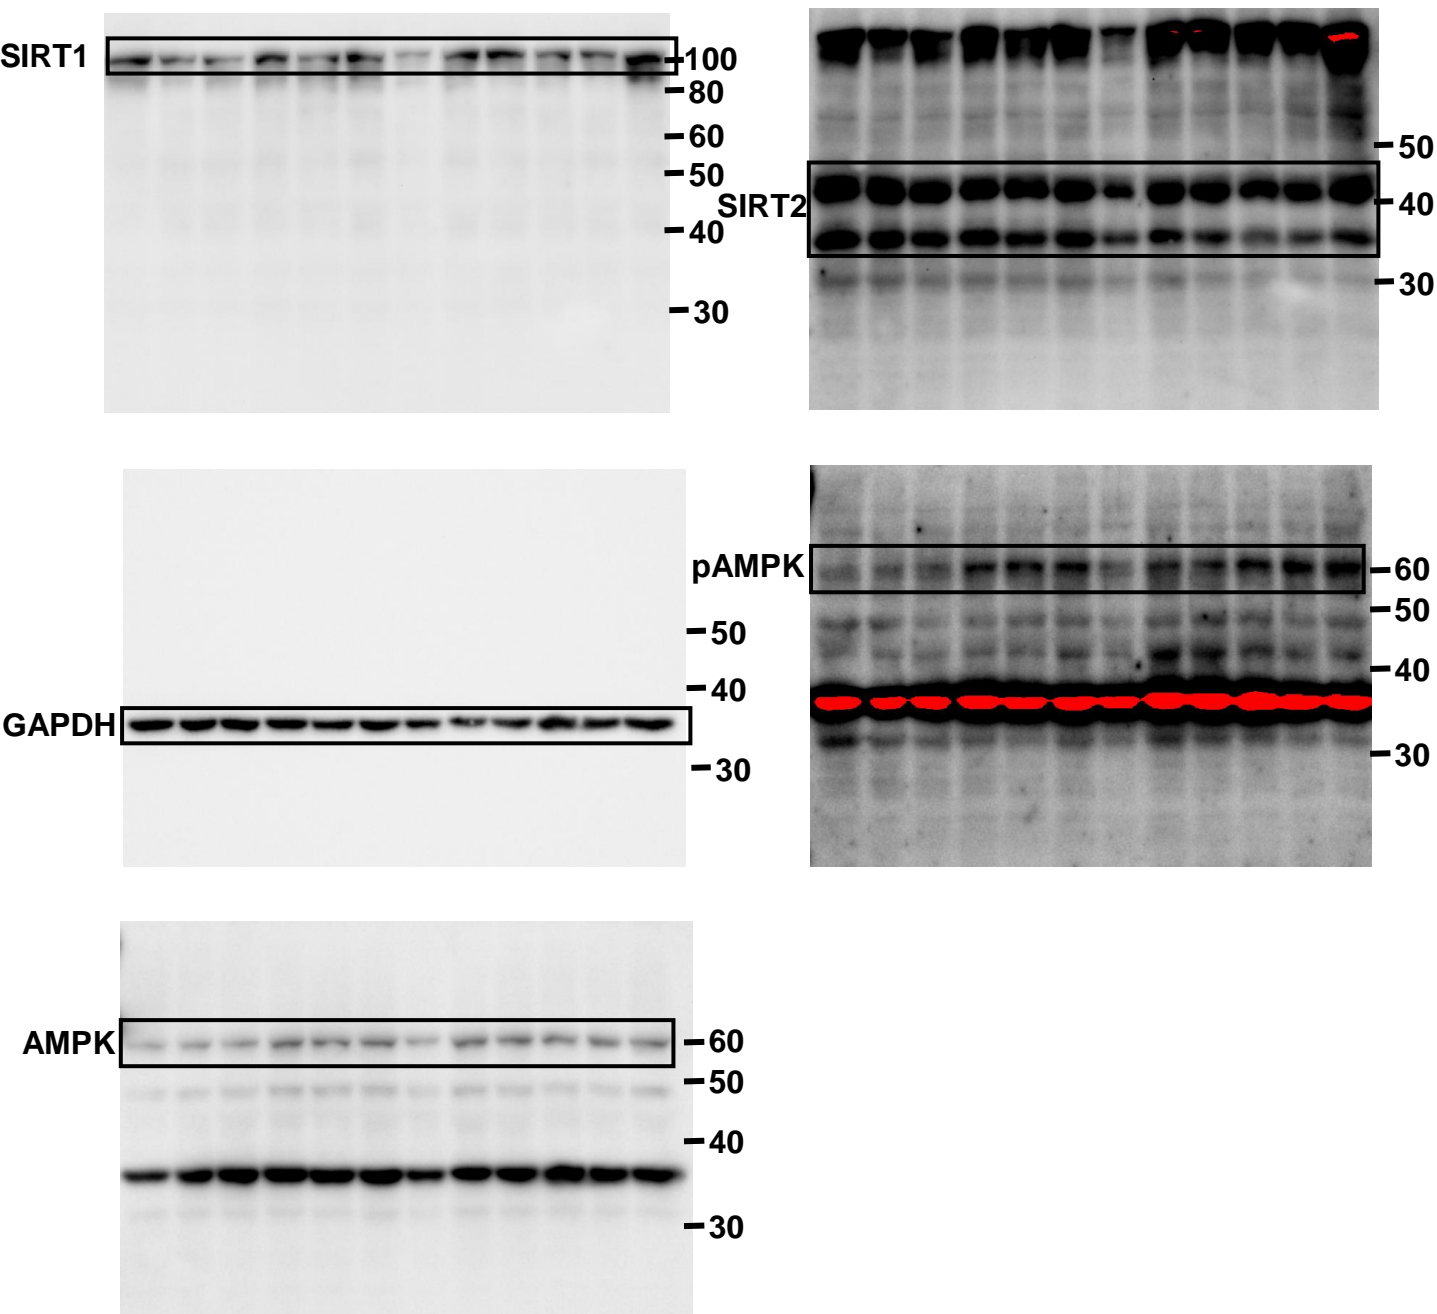

# Supplementary Fig. 3

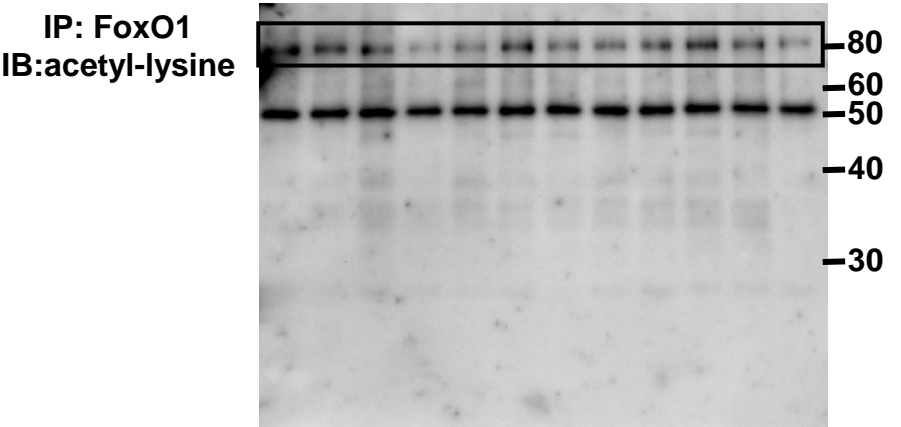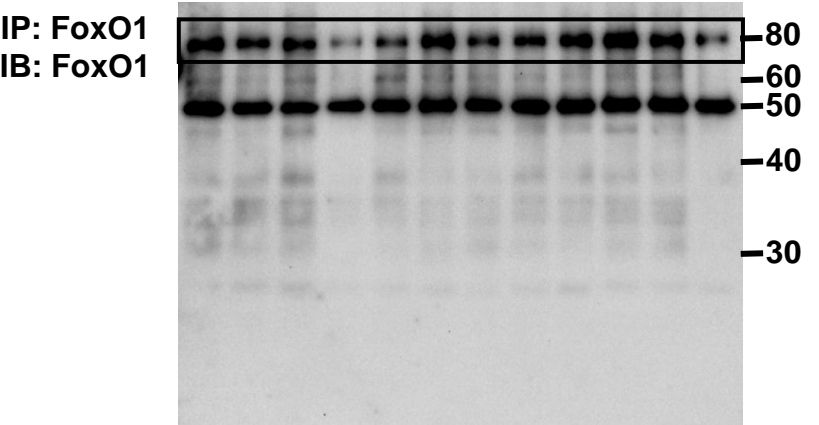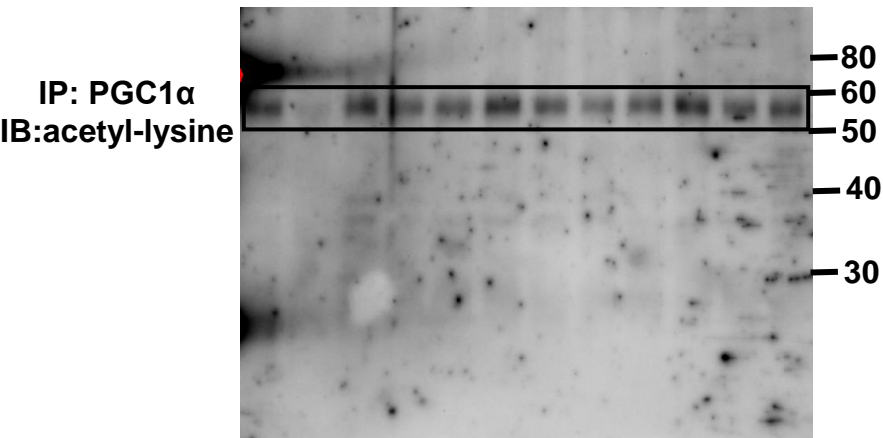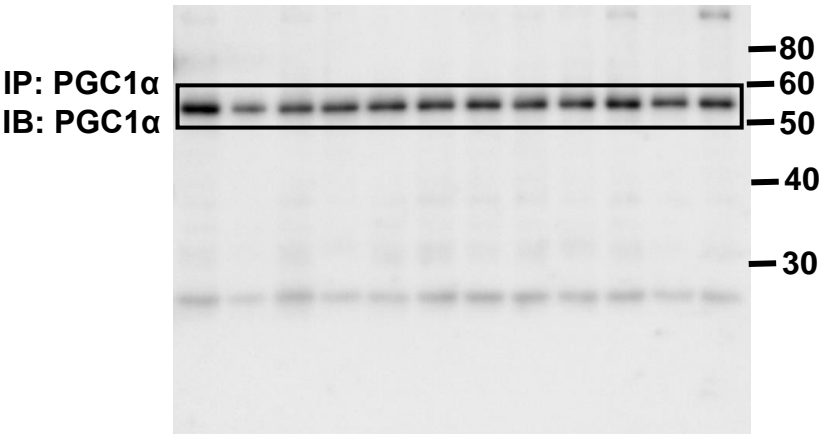

Supplement: s1 [file s1]
